# Supplementary material for: Light-induced production of isobutanol and 3-methyl-1-butanol by metabolically engineered cyanobacteria
Source: PubMed Central journal article supplement (PMC8740407; doi:10.1186/s12934-021-01732-x), 2022-01-06
Supplement: 12934_2021_1732_MOESM1_ESM.pdf [file 12934_2021_1732_MOESM1_ESM.pdf]

**Microbial Cell Factories**

## **Additional file 1**

### **Green light-induced production of isobutanol and 3-methyl-1-butanol by metabolically engineered cyanobacteria**

**Shunichi Kobayashi<sup>1</sup>, Shota Atsumi<sup>2</sup>, Kazunori Ikebukuro<sup>1</sup>, Koji Sode<sup>3</sup>,  
and Ryutaro Asano<sup>1 §</sup>**

<sup>1</sup>Department of Biotechnology and Life Science, Tokyo University of Agriculture and Technology, 2-24-16, Naka-cho, Koganei, Tokyo 184-8588, Japan

<sup>2</sup>Department of Chemistry, University of California Davis, One Shields Avenue, Davis, CA 95616, United States

<sup>3</sup>Joint Department of Biomedical Engineering, The University of North Carolina at Chapel Hill and North Carolina State University, Chapel Hill, NC 27599, United States

§ Corresponding author; Ryutaro Asano (ryutaroa@cc.tuat.ac.jp)

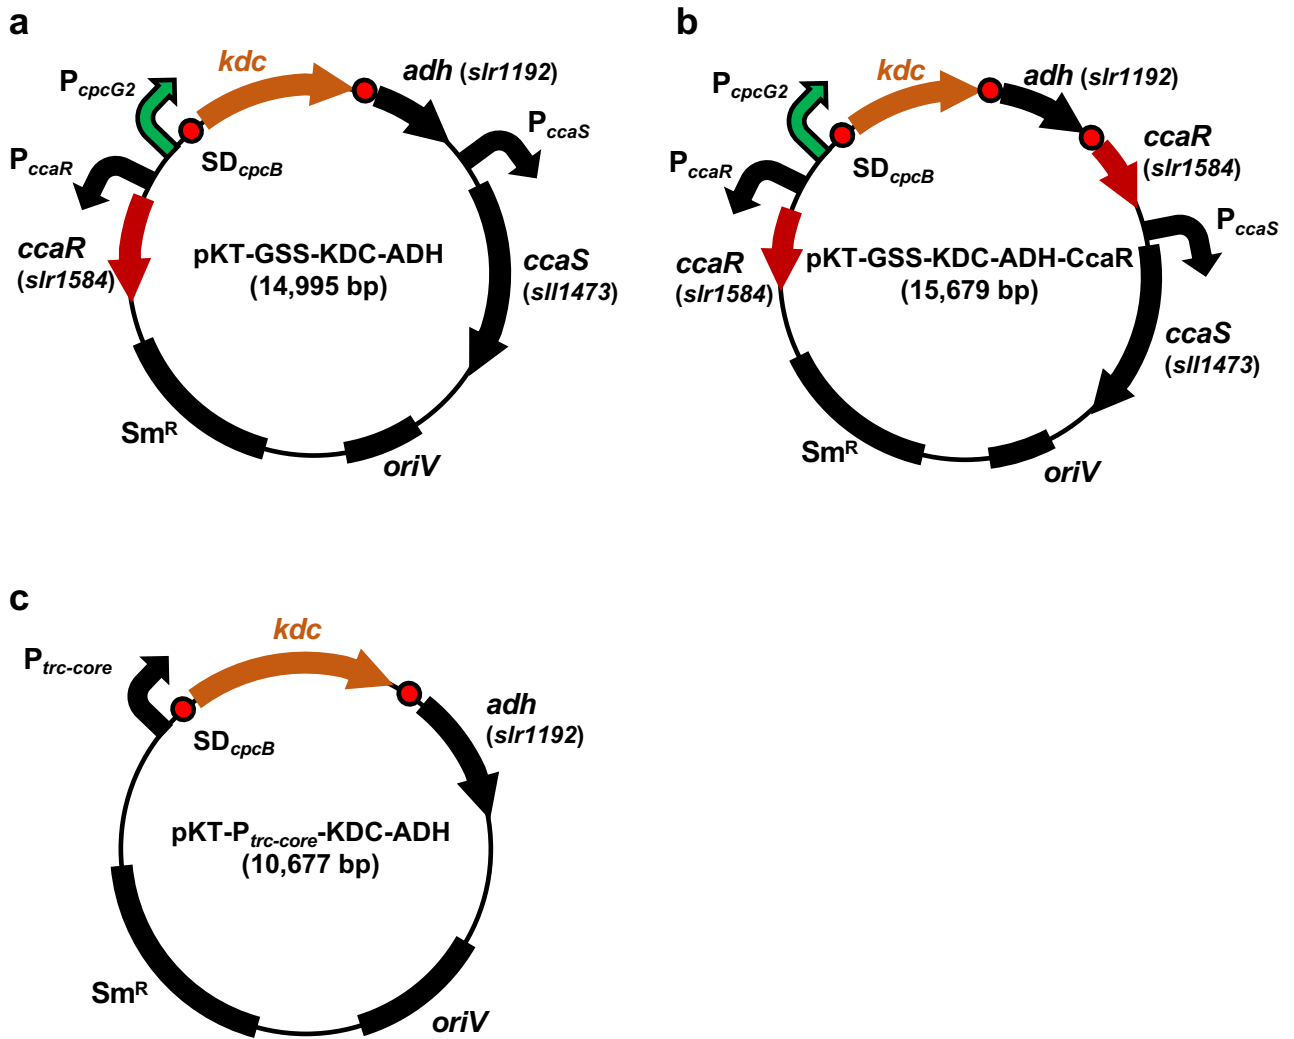

**Fig. S1** Design of vectors used in this study. **(a)** pKT-GSS-KDC-ADH for the application of CcaS/CcaR system to produce alcohol in cyanobacteria. pKT-GSS-KDC-ADH was constructed by inserting *kdc* and *adh* into the downstream of  $P_{cpcG2}$  on pKT-GSS. **(b)** pKT-GSS-KDC-ADH-CcaR to tune the CcaS/CcaR system up for the enhancement of alcohol production. pKT-GSS-KDC-ADH-CcaR was constructed by inserting the structural genes of *kdc*, *adh*, and *ccaR* into the downstream of  $P_{cpcG2}$  on pKT-GSS. **(c)** pKT-P<sub>trc-core</sub>-KDC-ADH for the constitutive activation of alcohol production in cyanobacteria. The *oriV* origin is replicated in *Synechocystis* sp. PCC 6803. Gene abbreviations are as follows:  $P_{ccaS}$ , *ccaS* promoter;  $P_{ccaR}$ , *ccaR* promoter;  $P_{cpcG2}$ , *cpcG2* promoter; *kdc*, keto-acid decarboxylase; *adh*, alcohol dehydrogenase;  $Sm^R$ , streptomycin-resistance gene;  $SD_{cpcB}$ , Shine Dalgarno-like sequence of *cpcB* derived from *Synechococcus* sp. PCC 7002.

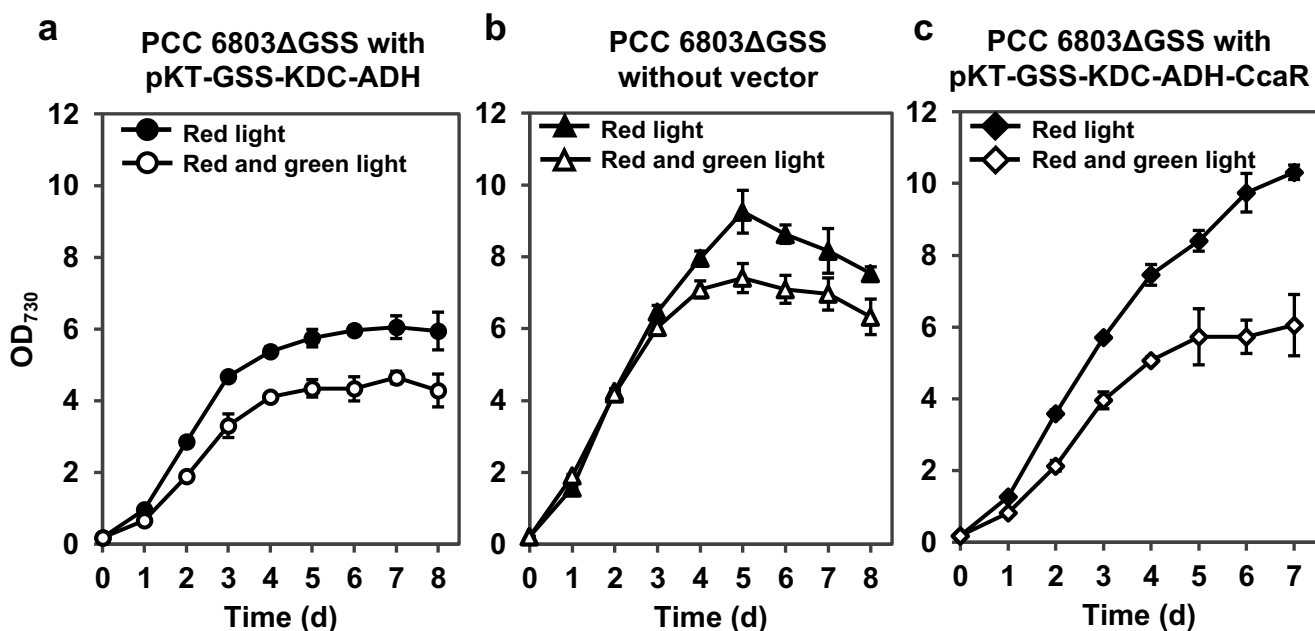

**Fig. S2** Growth curves of each strain used in this study. Growth curves of (a) the PCC 6803ΔGSS strain with pKT-GSS-KDC-ADH, (b) the PCC 6803ΔGSS strain, and (c) the PCC 6803ΔGSS strain with pKT-GSS-KDC-ADH-CcaR. All strains were cultivated under the red light illumination alone (black markers) and under the red and green light illumination (white markers). All analyses were performed in triplicate. Error bars represent the standard deviation (SD) calculated from triplicate experiments using one clone.

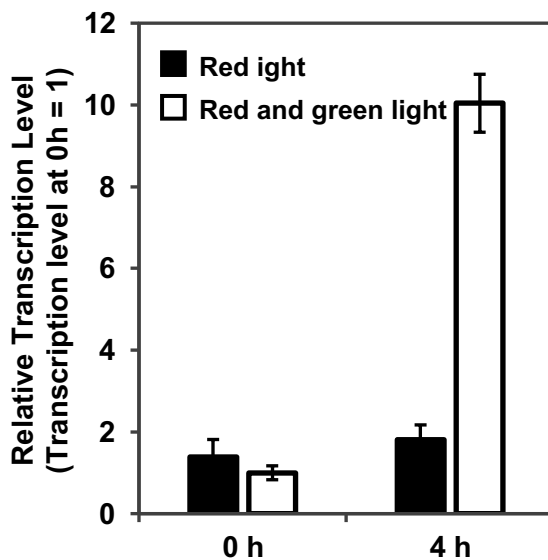

**Fig. S3** Transcriptional analysis of *kdc* gene in the *Synechocystis* sp. PCC 6803ΔGSS strain. The relative gene transcription levels of *kdc* in the transformants of *Synechocystis* sp. PCC 6803ΔGSS integrated with pKT-GSS-KDC-ADH cultivated under the red light illumination alone (black bar) and under the red and green light illumination (white bar) are shown. All analyses were performed in triplicate. Error bars represent the SD calculated from triplicate experiments using one clone.

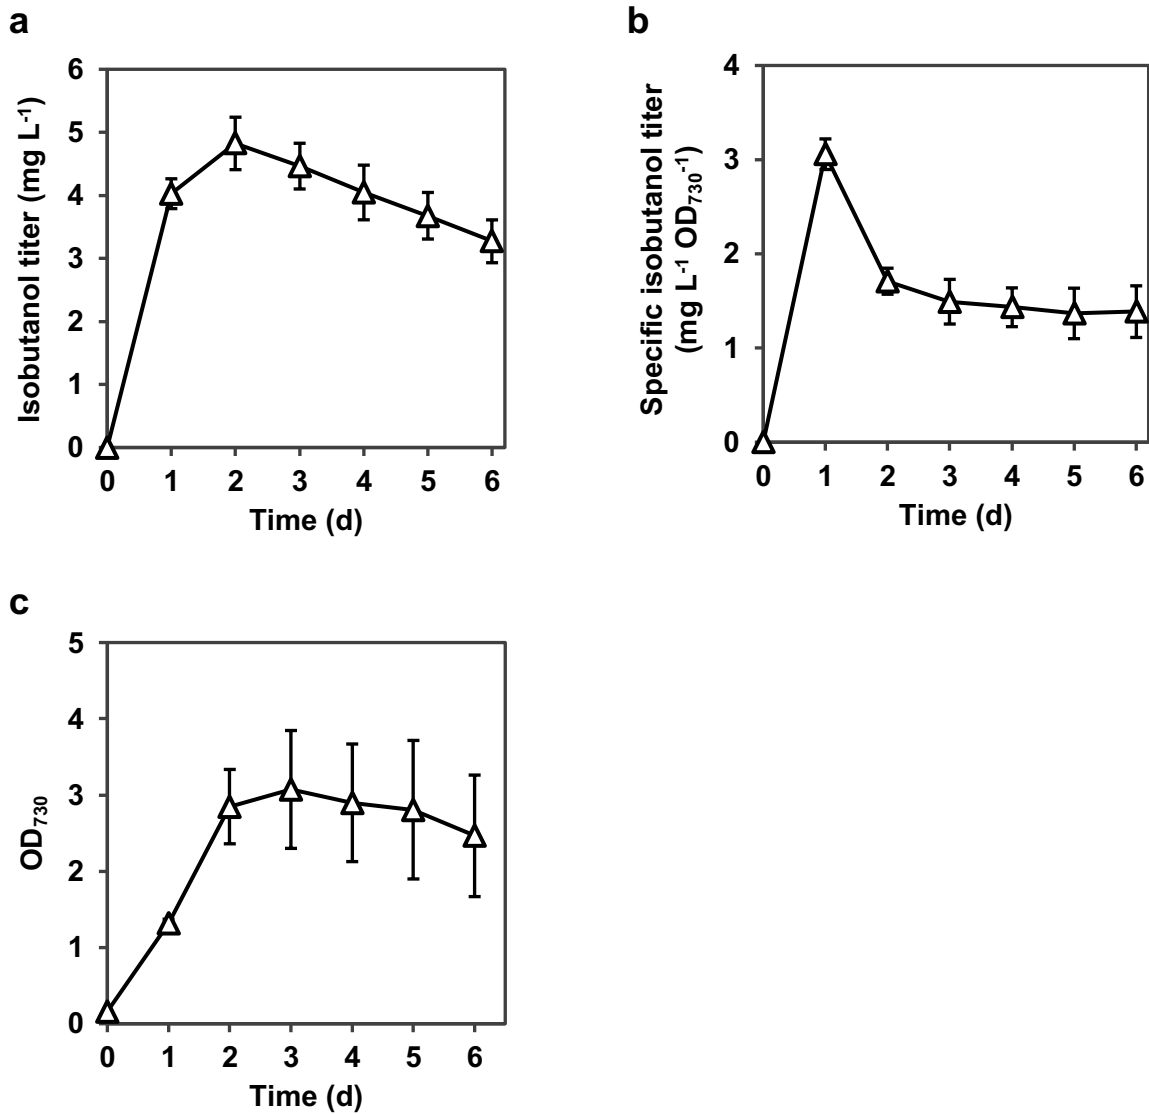

**Fig. S4** Evaluation of alcohol production utilizing the  $P_{irc-core}$  system in *Synechocystis* sp. PCC 6803 $\Delta$ GSS. **(a)** Production titer of isobutanol in the culture supernatant of *Synechocystis* sp. PCC 6803 $\Delta$ GSS transformed with pKT- $P_{irc-core}$ -KDC-ADH cultivated under the red and green light illumination. **(b)** Specific titer of isobutanol under the red and green light illumination. **(c)** Growth curve of the transformant cultivated under the red and green light illumination. All analyses were performed in triplicate. Error bars represent the SD calculated from triplicate experiments using one clone.

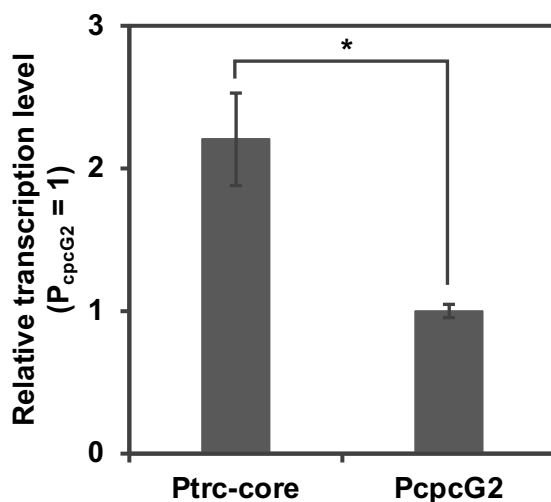

**Fig. S5** Comparison of transcription level of *kdc* gene between the  $P_{trc-core}$  and the  $P_{cpcG2}$ . Transcription analysis was conducted after 24 h of cultivation of the PCC 6803 $\Delta$ GSS strain transformed with pKT- $P_{trc-core}$ -KDC-ADH or pKT-GSS-KDC-ADH under red and green light illumination. All analyses were performed in triplicate. Error bars represent the SD calculated from triplicate experiments using one clone. Statistical analysis was performed using Student's *t*-test: \*  $p < 0.05$ .

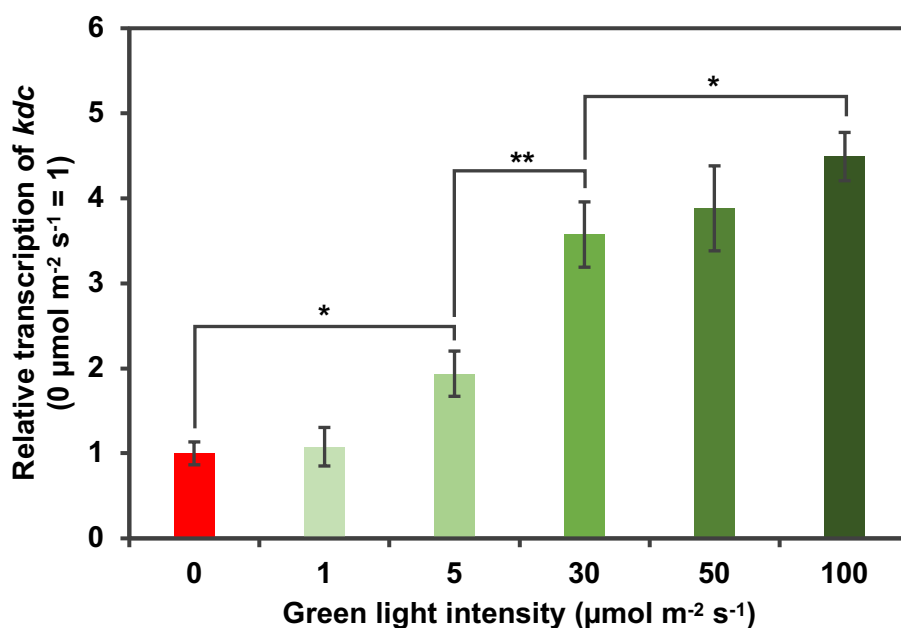

**Fig. S6** Comparison of transcription level of *kdc* gene from the  $P_{cpcG2}$  under the various intensities of green light. Transcription level of *kdc* in the PCC 6803 $\Delta$ GSS strain transformed with pKT-GSS-KDC-ADH under green light illumination ( $0 \mu\text{mol m}^{-2} \text{s}^{-1}$ ,  $1 \mu\text{mol m}^{-2} \text{s}^{-1}$ ,  $5 \mu\text{mol m}^{-2} \text{s}^{-1}$ ,  $30 \mu\text{mol m}^{-2} \text{s}^{-1}$ ,  $50 \mu\text{mol m}^{-2} \text{s}^{-1}$ , or  $100 \mu\text{mol m}^{-2} \text{s}^{-1}$ ) with red light illumination ( $30 \mu\text{mol m}^{-2} \text{s}^{-1}$ ) was shown. All analyses were performed in triplicate. Error bars represent the SD calculated from triplicate experiments using one clone. Statistical analysis was performed using one-way analysis of variance (ANOVA) with Tukey's multiple comparison test: \*  $p < 0.05$ , \*\*  $p < 0.005$ .

**Table S1** Comparison of the isobutanol production titer in cyanobacteria expressing keto-acid decarboxylase (*kdc*) and alcohol dehydrogenase (*adh*) in this study with that in previous studies.

| Strain       | Promoter (Inducer)          | Genes               | Titer                  | Productivity*                         | Production time | Ref.       |
|--------------|-----------------------------|---------------------|------------------------|---------------------------------------|-----------------|------------|
| PCC 7942     | $P_{trc}$ (IPTG)            | <i>kdc, yqhD</i>    | 50 mg L <sup>-1</sup>  | 17 mg L <sup>-1</sup> d <sup>-1</sup> | 3 d             | [3]        |
| PCC 6803     | $P_{tac}$ (No inducer)      | <i>kdc, adhA</i>    | 90 mg L <sup>-1</sup>  | 15 mg L <sup>-1</sup> d <sup>-1</sup> | 6 d             | [26]       |
| PCC 6803     | $P_{trc-core}$ (No inducer) | <i>kdc</i> (S286T)  | 911 mg L <sup>-1</sup> | 20 mg L <sup>-1</sup> d <sup>-1</sup> | 46 d            | [28]       |
| PCC 6803ΔGSS | $P_{cpcG2}$ (Green light)   | <i>kdc, slr1192</i> | 238 mg L <sup>-1</sup> | 48 mg L <sup>-1</sup> d <sup>-1</sup> | 5 d             | This study |

\* The productivity was calculated as the average production level per day by dividing the titer by the number of days required for production.

**Table S2** Comparison of the isobutanol production in this study with the highest titer and productivity achieved in previous studies.

| Strain        | Promoter (Inducer)           | Genes                              | Titer                  | Productivity*                           | Production time | Ref.       |
|---------------|------------------------------|------------------------------------|------------------------|-----------------------------------------|-----------------|------------|
| PCC 7942      | $P_{trc}, P_{LlacO1}$ (IPTG) | <i>kdc, yqhD, alsS, ilvC, ilvD</i> | 450 mg L <sup>-1</sup> | 75 mg L <sup>-1</sup> day <sup>-1</sup> | 6 d             | [3]        |
| PCC 7942ΔglgC | $P_{trc}, P_{LlacO1}$ (IPTG) | <i>kdc, yqhD, alsS, ilvC, ilvD</i> | 550 mg L <sup>-1</sup> | 69 mg L <sup>-1</sup> day <sup>-1</sup> | 8 d             | [24]       |
| PCC 7942      | $P_{trc}, P_{LlacO1}$ (IPTG) | <i>kdc, adhA, alsS, ilvC, ilvD</i> | 637 mg L <sup>-1</sup> | 32 mg L <sup>-1</sup> day <sup>-1</sup> | 20 d            | [25]       |
| PCC 6803      | $P_{trc-core}$ (No inducer)  | <i>kdc</i> (S286T)                 | 911 mg L <sup>-1</sup> | 20 mg L <sup>-1</sup> day <sup>-1</sup> | 46 d            | [28]       |
| PCC 6803ΔGSS  | $P_{cpcG2}$ (Green light)    | <i>kdc, slr1192</i>                | 238 mg L <sup>-1</sup> | 48 mg L <sup>-1</sup> day <sup>-1</sup> | 5 d             | This study |

\* The productivity was calculated as the average production level per day by dividing the titer by the number of days required for production.

**Table S3** Comparison of the 3-methyl-1-butanol titer in cyanobacteria obtained in this study with that in previous studies.

| <b>Strain</b>                 | <b>Promoter (Inducer)</b>                                   | <b>Genes</b>                       | <b>Titer</b>           | <b>Productivity*</b>                  | <b>Production time</b> | <b>Ref.</b> |
|-------------------------------|-------------------------------------------------------------|------------------------------------|------------------------|---------------------------------------|------------------------|-------------|
| PCC 7942 $\Delta$ <i>glgC</i> | P <sub><i>trc</i></sub> , P <sub><i>Llac01</i></sub> (IPTG) | <i>kdc, yqhD, alsS, ilvC, ilvD</i> | 70 mg L <sup>-1</sup>  | 10 mg L <sup>-1</sup> d <sup>-1</sup> | 7 d                    | [20]        |
| PCC 6803                      | P <sub><i>trc-core</i></sub> (No inducer)                   | <i>kdc</i> (S286T)                 | 225 mg L <sup>-1</sup> | 5 mg L <sup>-1</sup> d <sup>-1</sup>  | 46 d                   | [23]        |
| PCC 6803 $\Delta$ GSS         | P <sub><i>cpcG2</i></sub> (Green light)                     | <i>kdc, slr1192</i>                | 75 mg L <sup>-1</sup>  | 15 mg L <sup>-1</sup> d <sup>-1</sup> | 5 d                    | This study  |

\* The productivity was calculated as the average production level per day by dividing the titer by the number of days required for production.

**Table S4** Sequences of the vector inserts used in this study.

| <b>pKT-GSS-KDC-ADH</b>                                                                                                                                                                                                                                                                                                                                                                                                                                                                                                                                                                                                                                                                                                                                                                                                                                                                                                                                                                                                                                                                                                                                                                                                                                                                                                                                                                                                                                                                                                                                                                                                                                                                                                                                                                                                                                                                                                                                                                                                                                                                                                                                                                                                                                                                                                                                                                                                                                                                                                                                                                                                                                                                                                                                                                                                                                                                                                                                                                                                                                                                                                                                                                                                                                                                                                                                                                                                                                                                                                                                                                                                                                                                                                                                                                                                                                                                                                                                                                                                                                                                                                                                                                                                           |
|----------------------------------------------------------------------------------------------------------------------------------------------------------------------------------------------------------------------------------------------------------------------------------------------------------------------------------------------------------------------------------------------------------------------------------------------------------------------------------------------------------------------------------------------------------------------------------------------------------------------------------------------------------------------------------------------------------------------------------------------------------------------------------------------------------------------------------------------------------------------------------------------------------------------------------------------------------------------------------------------------------------------------------------------------------------------------------------------------------------------------------------------------------------------------------------------------------------------------------------------------------------------------------------------------------------------------------------------------------------------------------------------------------------------------------------------------------------------------------------------------------------------------------------------------------------------------------------------------------------------------------------------------------------------------------------------------------------------------------------------------------------------------------------------------------------------------------------------------------------------------------------------------------------------------------------------------------------------------------------------------------------------------------------------------------------------------------------------------------------------------------------------------------------------------------------------------------------------------------------------------------------------------------------------------------------------------------------------------------------------------------------------------------------------------------------------------------------------------------------------------------------------------------------------------------------------------------------------------------------------------------------------------------------------------------------------------------------------------------------------------------------------------------------------------------------------------------------------------------------------------------------------------------------------------------------------------------------------------------------------------------------------------------------------------------------------------------------------------------------------------------------------------------------------------------------------------------------------------------------------------------------------------------------------------------------------------------------------------------------------------------------------------------------------------------------------------------------------------------------------------------------------------------------------------------------------------------------------------------------------------------------------------------------------------------------------------------------------------------------------------------------------------------------------------------------------------------------------------------------------------------------------------------------------------------------------------------------------------------------------------------------------------------------------------------------------------------------------------------------------------------------------------------------------------------------------------------------------------------|
| CTGCAGTGCCACTTGACGTCTAAGAAAAGGAATATTCAGCAATTTGCCCGTGCCGAAGAAAGGCCACCCGCT<br>GAAGGTGAGCCAGTGAGTTGATTGCTACGTAATTAGTTAGTTAGCCCTTAGTGACTCGAATTCGCGGCCGCT<br>TCTAGGCGCAACGTTCAAATCCGCTCCCGCGGATTTGTCCTACTCAGGAGAGCGTTCACCGACAAAACA<br>GATAAAACGAAAGGCCAGTCTTTCGACTGAGCCTTTCGTTTTATTTGATGCCTGGCAGTTCCTACTCTCG<br>CATGGGGAGACCCACACTACCATCGGCGCTACGGCGTTTCACTTCTGAGTTCGGCATGGGGTCAGGTGGGA<br>CCACCGCGCTACTGCCGCCAGGCAAATTTCTGTTTTATCAGACCCTTCTGCGTTCTGATTTAATCTGTATCA<br>GGCTGAAAATCTTCTCTCATCCGCCAAAACAGCCAAGCTTCTAGTTTTTCCCTTGGCACAAAGATTTTTCCG<br>TTAAATTGGCCAGACGATAACCAATGCCATGGACCGTTTCAATGGCATCTGCTGATAAACGGCAGTTTTTTA<br>ATTTTTGTGCGAACTCCGCACATGCACCTTAACCGTATCTTCCTCTGGGGGACTCTCCAATTCCAGATAC<br>TATCGATAATCATGCTCCGACTTAGCACCCGACGGCCATTGCGGAGTAGTAATCCAGAATGCTGTATTCCT<br>TGCGGGTCAAAGACAAAACCTCATTGTCACTAACTTCATAGGTGCTTGGATCCAACCTGATTGGCCCC<br>ACTCTAAAACCTGGTTGGCACGTTGCACAACCCCGACGCAACAAGCTCGCACCTGGCAAATAACTCCCCA<br>AATCCACTGGCTTGACCACATAATCATCCGCCCCCGCATCCAAGCCCGTGATTTTATCATTGATCGTATCCC<br>TGGCTGTATCATCAAATTTGGCATTAAATAACTGTGCGATCGCCATTTTGGACAGAGGGTAATCCCGTCCA<br>ACTCCGGCAGCATCACATCCAAAATAACGAGGTCAATTTCCAGTCGGGAGGCATAGTCCAGGGCAGGGAAAG<br>CGTCGGTGGCAATATCAACGGTGTAAAGCTGGTCACTCAATGCTTCAGCAAGGGTTTCCGCCAGCGGCAAAT<br>CATCCTCCACTAAAAGAATTCTCATAGCCCATTTGTGCTTTTCTCTATCAACCTCAGCTTACCTGAAGGGGTG<br>AACAGGTCTGGGTTAATTCATGTTGCGAAATGTAACAGTTTTAGTCGCATCAGCTAACTTTCCGATTTCTTT<br>ACGATTTTCTCCCCTTTTCTTCAATTTTACTTTGTTAGGATCGCATTTTAAATGCCAACACATACCAGTTA<br>TTGGCTGGACATTAACAACCTTTAAGTTAATTACTAAGTAGATCTTATAAGTAGGAGATAAAAAACATGTA<br>TACGGTTGGAGATTATCTGCTTGATCGCCTGCATGAACTAGGCATTGAGGAAATCTTTGGTGTTCGGGTGA<br>TTACAATCTGCAATTTCTGGATCAGATCATTAGTCGAAAAGACATGAAATGGGTTGGTAACGCCAATGAACT<br>GAATGCGTTCGTATATGGCTGACGGTTATGCCCGTACAAAAAAGCGGCTGCGTTCTTGACGACCTTTGGTGT<br>GGGAGAACTTAGCGCCGTAATGGCTTAGCCGGCAGCTATGCGGAAAACCTGCCTGTAGTGGAATCGTTGG<br>CTCTCCCACGTCAAAGTGCAGAATGAAGGCAAATTCGTCCATCATAACCTGGCAGATGGCGATTTTAAGCA<br>CTTTATGAAAATGCATGAACCTGTGACAGCGGCGAGAACTCTGTTAACCGCGGAAAACGCCACCGTTGAGAT<br>CGACCGCGTACTAAGCGCTCTGCTTAAAGAACGTAAACCGGTGTATATCAATCTGCCGGTAGATGTCGCGGC<br>TGCGAAAGCCGAAAACCAAGTTTACCCTGTAAGAAAAGAGAATAGCACATCTAACACCAGTGATCAGGAAAT<br>CCTCAACAAGATCCAGGAATCCCTGAAAAATGCGAAAAAGCCGATCGTGATTACAGGACACGAAATATTTTC<br>ATTTGGGCTGGAGAAAACCGTGTCTCAGTTCATAAGCAAGACGAAACTGCCATTACCACCTTGAACCTTGG<br>TAAATCGTCCGTGGATGAAGCGTTACCCTGTTTTTGGGGATTTACAATGGCAAACCTGTCAGAGCCGAATTT<br>GAAGGAATTCGTGGAAGCGCCGATTTTCAATCTGATGCTTGGCGTGAACCTGACTGATAGTTCGACGGGTGC<br>CTTTACTCATCACTTAAACGAGAACAAAATGATCTCTCTCAACATTGACGAGGGCAAGATTTTCAACGAGTC<br>CATTCAGAACTTCGACTTCGAGTCTTTGATTAGCAGTCTGCTGGATCTGTCGGAAATCGAATACAAAAGGAA<br>ATACATTGACAAGAAACAGGAAGACTTTGTACCGTCCAATGCATTACTGAGTCAAGATCGCCTGTGGCAAGC<br>GGTTGAGAACCTTACGCAAAGCAACGAAACCATAGTCGCCGAACAAGGTACGTCGTTTTTTCGGAGCAAGCAG<br>CATCTTCCTGAAACCAAATCACACTTTATCGGTCAACCCTCTGGGGTTCATTGGTTACACCTTTCCAGC<br>AGCTCTCGGCTCACAGATAGCGGATAAAGAGAGTCGACACCTGCTGTTTATTGGCGATGGTTCTTTGCAGTT<br>GACTGTTAGGAACTCGGCTTAGCAATTCGGGAGAAGATTAACCCATTGCTTCATCATCAATAATGACGG<br>GTATACCCTCGAACGTGAAATCCATGGGCCAAATCAAAGCTATAACGACATTCAGATGTGGAACATATTCGAA<br>ACTTCCGGAATCGTTTGGCGCAACTGAAGAACGTGTCGTGCCAAAATCGTGCGTACAGAAAACGAGTTTGT<br>CAGCGTTATGAAAAGAAGCGCAGGCAGATCCGAATCGCATGTACTGGATCGAGCTGATTCTGGCCAAAGAAGA<br>CGCTCCGAAAGTCTGAAGAAAATGGGCAAACCTTTCGCGAAGCAGAACAATCCTAATATAAGTAGGAGAT<br>AAAAACATGATTAAGCCTACGCTGCCCTGGAAGCCAACGGAAAACCTCCAACCTTTGAATACGACCCCGGT<br>GCCCTGGGTGCTAATGAGGTGGAGATTGAGGTGCAGTATTGTGGGGTGTGCCACAGTGATTTGTCCATGATT<br>AATAACGAATGGGGCATTCCAATTACCCCTAGTGCCGGTTCATGAGGTGGTGGGTACTGTGGCCGCCATG<br>GGCGAAGGGGTGAACCATGTTGAGGTGGGGGATTTAGTGGGGCTGGGTTGGCATTCCGGGCTACTGCATGACC<br>TGCCATAGTTGTTTATCTGGCTACCACAACCTTTGTGCCACGGCGGAATCGACCATTGTGGCCACTACGGT<br>GGCTTTGGCGATCGGGTTCGGGCCAAGGGAGTCAGCGTGGTGAATTAACCTAAAGGCATTGACCTAGCCAGT<br>GCCGGGCCCTTTTCTGTGGAGGAATTACCGTTTTTCACTCCTATGGTGGAACTGAGTTTAAAGCCCACTGCA<br>AAAGTGGCAGTGATCGGCATTGGGGCTTGGGCCATTTAGCGGTGCAATTTCTCCGGGCTGGGGCTGTGAA<br>GTGACTGCCTTTACCTCCAGTGCCAGGAAGCAAACGGAAGTGTGGAATTGGGCGCTCACCACATACTAGAT<br>TCCACCAATCCAGAGGCATCGCCAGTGCAGGAAAGCAAATTTGACTATATATCTCCACTGTGAACCTGAAG<br>CTTGACTGGAACCTATAACATCAGCACCTTGGCGCCCAGGGACATTTCCACTTTGTTGGGGTGGTGTGGAG |



CCTTTGGATCTAAATCTTTTTCCCCTTTTGATGGGACAACGCTCCGTTTCTGCCTCCCCAGTGGGAGTCCC  
GCCACCATTGCCACCATGTTGGACTTTGCTGTGCGCCATGACATTAACCCGTTGGTGGAAACAATTTAGCTTT  
GATCAGATCAACGAGGCGATCGCCCATCTAGAAAGCGGCAAAGCCATTATCGGGTAGTGCTCAGCCATAGT  
AAAAATTAGTCTAGATTTTTTTGACGGTAAAGCCAAGCTGAAGGCTGACAAAATCTATACTGTTATATCCCC  
CTTTCCTGGGGGACTTAGGCGGTTTAATAACTGGGGTTTTGCTAGAAAATTTTTGGCGTTTAATTATTTAT  
TCTCTGGTTTAATATTTTCGAGACTTTGCAGACTTTGTATTTGAGGCCAGACTCCAATGTTGAAACTAGCCGG  
TAAAAAAGCCTCTGCCCTGACCTGCAAGAAAACGAAGGCAAAAATTGGTATCCTAGAAAATGGATCGGCAGTG  
GTATCAATCAGTCAAGCGATTTTTATGTCCAAGTTTTGAAATTTCTGCTATCAACTCCAAGATATTTTGTT  
TAACAATGTTGACGTTGGAGAATATCATTGATCCTAGTTGGTTGCGGGATTAATAATGAATCAATTGATAT  
TTCAGTACTTTAGATTTAGTGACCATTATTAATAAATTTGTCTGCTAAGCCGCGGCCCTACTACTAATTAC  
GGATTGTGCCGACAGTCAGATCACGGTACAAGCTCGCAGTTACCTGCCCAAATTGACGGCGTTTTTTGCCAA  
GGATCATGATTTAGCTTTATTTGTTAAAAGTCATGAAAATTTATTGCCAAAACAAAATATTTTAAGTAAGGTTT  
TTCTACTGGGATTTCGCTAATATATGGGGCAAATTTCTAATTCCAATCGAATTTGTTTTTCTGGCGATCGCCAT  
GACCTGTTATTTATGGCACAGACAAAACCAAGAACGCCGAGGATTGAAATTAGCATCAAGCAACAAACCCA  
ACGGGAACGATTTATTAACCAAATTAACCAACATATCCGCCAATCTTTAAACTTGGAAACGGTTTTAAATAC  
CACCGTGCCTGAAGTTAAAACCCGTGTTGCAAGTTGATCGAGTTCTAATTTATCGCATTTGGCAAGATGGCAC  
GGGCAGCGCCATTACGGAATCGGTGAATGCCAATTATCCTAGTATTTTAGGGCGGACCTTTTCCGATGAAGT  
TTTTCCCCTGGAATACCATCAAGCCTACACCAAAGGTAAAGTACGGGCCATTAATGACATTGACCAGGATGA  
CATAGAGATTTGCCCTAGCTGATTTTCGTCAAACAATTTGGCGTGAATCAAAAATTAGTAGTGCCCATTTCTTCA  
ACATAATCGTGCTTCTTCCCTAGATAATGAATCAGAATTTCCCTATCTTTGGGGGCTGTTAATTACCCATCA  
ATGTGCTTTTACC CGGCCATGGCAACCGTGGGAAGTGGAGTTAATGAAACAGCTAGCCAATCAGGTGCGGAT  
CGCCATCCAACAATCGGAATTATATGAGCAATTACAGCAACTCAATAAAGATTTGGAAAACCGAGTCGAAAA  
ACGCACCCAGCAACTTGCCGCCACCAATCAATCCCTAAGAATGGAAATCAGTGAGCGACAAAAACGGAAGC  
CGCTCTCCGCCACACTAACCATACTCTGCAATCCCTGATTGCGGCCTCCCCAGGGGTATTTTTTACCCTTAA  
TTTAGCAGACCAAATTCAGATTTGGAATCCTACAGCAGAACGTATTTTTGTTGGACAGAAACAGAAATTTAT  
TGCCCATCCAGAATTTAATACATCCAACATTTTGCTGGAAGATTATCAGCAATTTAAACAGAAAGTTTTATC  
AGGCATGGTTTTCCCCTAGCCTAGAATTAATAATGTCAAAAAAAGATGGTAGTTGGATTGAAATTTGCTTTT  
CGCTGCTCCCCTATTGGATAGTGAAGAAAATATTGCCGGATTGGTGGCGGTTGTGCGCGATATTACCGAGCA  
AAAGCGGCAGGCAGAACAAATTCGTTTGCTACAATCCGTTGTGGTTAATACTAATGATGCGGTGGTGATTAC  
GGAAGCGGAGCCCATGATGATCCC GGCCGAGAATTTCTTATGTCAATGAAGCATTACTAAAATCACCGG  
TTATACTGCTGAAGAAATGCTAGGCAAACCCCGAGTTTTACAGGGACCAAAAACCTAGTCGCACTGAATT  
AGATAGGGTGGCGCAAGCCATTAGTCAATGGCAATCAGTTACC GTTGAAGTGATTAATTTATCGTAAGGATGG  
CAGTGAGTTTTGGGTGGAATTTAGTCTGGTGCCGTTGCCAATAAAACAGGTTTTTACACCCATTGGATTGC  
TGTGCAAAGGGATGTCCTGAGCGCCGACGCACGGAGGAAGTCCGCCTAGCTTTAGAACGGGAAAAAGAATT  
AAGCCGCCTAAAACTCGTTTTTCTCCATGGCTTCCCATGAATTTCTGACTCCCCTCAGTACGGCCTTAGC  
TGCTGCCCAATTACTGGAAAATTTCTGAAGTGGCCTGGCTTGATCCC GATAAGCGTAGCCGGAACCTTACACCG  
TATTCAAAATTCGTTGAAAAATATGGTACAGCTCCTGGATGATATTTAATCATTAAACCGTGCCGAAGCGGG  
CAAATTTGGAATTTAATCCTAATTTGGTTAGATTTGAAATTTATGTTCCAGCAATTTATCGAAGAAATTC AATT  
AAGTGTCAAGTACCAATATTATTTTACTTTATTTGTAGCGCTCAAGATACGAAGGCATTTGGTGGATGAAAG  
GTTAGTGGCGTCTATTTTATCTAATCTGTTATCTAATGCGATTAAATACTCTCCCGGGGAGGGCAGATTAA  
AATTGCCCTAAGCCTAGATTCGGAACAGATTATTTTTGAAGTACCAGCAGGGCATTGGCATTTCGCCAGA  
GGACCAAAAGCAAATTTTTGAACCCTTTCATCGGGGCAAAAATGTCAGAAAATTTACGGGAACAGGACTCGG  
TTAATGGTTGCCAAGAAATGTGTTGACTTACACAGTGGCAGTATCTTGCTAAAAAGTGCAGTTGACCAGGG  
AACAACAGTTACTATCTGTTTAAAACGCTATAACCATTTGCCTCGAGCTTAGCGCAAAAACCCCGCTTCGG  
CGGGTTTTTTTCGCCTGCAG

**pKT-GSS-KDC-ADH-CcaR**

CTGCAGTGCCACTTGACGTCTAAGAAAAGGAATATTTCAGCAATTTGCCCGTGCCGAAGAAAGGCCACCCGT  
GAAGGTGAGCCAGTGAGTTGATTGCTACGTAATTAGTTAGTTAGCCCTTAGTGACTCGAATTCGCGGCCGCT  
TCTAGGCGCAACGTTCAAATCCGCTCCCGCGGATTTGTCTACTCAGGAGAGCGTTACCCGACAAACAACA  
GATAAAACGAAAGGCCAGTCTTTTCGACTGAGCCTTTTCGTTTTATTTGATGCCTGGCAGTTCCCTACTCTCG  
CATGGGGAGACCCACACTACCATCGGCGCTACGGCGTTTCACTTCTGAGTTCCGGCATGGGGTCAGGTGGGA  
CCACCGCGCTACTGCCGCCAGGCAAATTTCTGTTTTATCAGACCGCTTCTGCGTTCTGATTTAATCTGTATCA  
GGCTGAAAATCTTCTCTCATCCGCCAAAACAGCCAAGCTTCTAGTTTTTCCCTTGGCACAAAGATTTTTCCG  
TTAAATTTGGCCAGACGATAACCAATGCCATGGACCGTTTCAATGGCATCTGCTGATAAACGGCAGCTTTTTA  
ATTTTTGTGCGAAACTCCGCACATGCACCTTAACCGTATCTTCTCTGGGGGACTCTCCAACCTCCAGATAC  
TATCGATAATCATGCTCCGACTTAGCACCCGACGGCCATTGCGGAGTAGTAATTCAGAAATGCTGTATTCCT  
TGCGGGTCAAAGACAAAACCTCATTGTCATAACTAATTCATAGGTGCTTGGATCCAACCTGATTGGCCCC

ACTCTAAAACCTGGTTGGCACGTTGCACAACCCCGACGCAACAAAGCTCGCACCCCTGGCAAATAACTCCCCCA  
AATCCACTGGCTTGACCACATAATCATCCGCCCCCGCATCCAAGCCCGTGATTTTATCATTTGATCGTATCCC  
TGGCTGTCATCATCAAATTGGCATTAAATAACTGTGCGATCGCCATTTTGTGACAGAGGGTAATCCCGTCCA  
ACTCCGGCAGCATCACATCCAAAATAACGAGGTTCATATCCAGTCGGGAGGCATAGTCCCAGGCGAGGGAAG  
CGTCGGTGGCAATATCAACGGTGTAAAGCTGGTCACTCAATGCTTCAGCAAGGGTTTCCGCCAGCGGCAAAT  
CATCCTCCACTAAAAGAATTCTCATAGCCCATTTGTGCTTTTCTCTATCAACCTCAGCTTACCTGAAGGGGTG  
AACAGGTCTGGGTTAATTCATGTTGCGAAATGTAACAGTTTGTAGTCGCATCAGCTAACTTTCCGATTTCTTT  
ACGATTTTCTCCCCCTTTTCTCAATTTTACTTTGTTAGGATCGCATTTTAAATGCCAACACATACCAGTTA  
TTGGCTGGACATTAACAACCTTTTAAAGTTAATTACTAACTAGATCTTATAAGTAGGAGATAAAAAACATGTA  
TACGGTTGGAGATTATCTGCTTGATCGCCTGCATGAACTAGGCATTGAGGAAATCTTTGGTGTTCGGGTGA  
TTACAATCTGCAATTTCTGGATCAGATCATTAGTCGCAAAAGACATGAAATGGGTTGGTAACGCCAATGAACT  
GAATGCGTTCGTATATGGCTGACGGTTATGCCCGTACCAAAAAGCGGCTGCGTTCTTGACGACCTTTGGTGT  
GGGAGAACTTAGCGCCGTAATGGCTTAGCCGGCAGCTATGCGGAAAACCTGCCTGTAGTGGAATCGTTGG  
CTCTCCCACGTCAAAAGTGCAGAATGAAGGCAAATTCGTCCATCATAACCCTGGCAGATGGCGATTTTAAGCA  
CTTTATGAAAATGCATGAACCTGTGACAGCGGCGAGAACTCTGTTAACCGCGGAAAACGCCACCGTTGAGAT  
CGACCGCGTACTAAGCGCTCTGCTTAAAGAACGTAAACCGGTGTATATCAATCTGCCGGTAGATGTGCGGGC  
TGCGAAAGCCGAAAACCAAGTTTACCCTGAAAGAAAGAGAATAGCACATCTAACACCAGTGATCAGGAAAT  
CCTCAACAAGATCCAGGAATCCCTGAAAATGCGAAAAGCCGATCGTGATTACAGGACACGAAATTTATTTT  
ATTTGGGCTGGAGAAAACCGTGTCTCAGTTTATAAGCAAGACGAAACTGCCATTACCACCTTGAACCTTGG  
TAAATCGTCCGTGGATGAAGCGTTACCCTCTTTTGGGGATTTACAATGGCAAACCTGTCAGAGCCGAATTT  
GAAGGAATTCGTGGAAAGCGCCGATTTTCAATCTGATGCTTGGCGTGAAACTGACTGATAGTTCGACGGGTGC  
CTTTACTCATCACTTAAACGAGAACAAAATGATCTCTCTCAACATTGACGAGGGCAAGATTTTCAACGAGTC  
CATTCAGAACCTTCGACTTCGAGTCTTTGATTAGCAGTCTGCTGGATCTGTCGGAATCGAATACAAAGGGAA  
ATACATTTGACAAGAAACAGGAAGACTTTGTACCGTCCAATGCATTACTGAGTCAAGATCGCCTGTGGCAAGC  
GGTTGAGAACCTTACGCAAAGCAACGAAACCATAGTCGCCGAACAAGGTACGTGCTTTTTCGGAGCAAGCAG  
CATCTTCCTGAAACCCAAATCACACTTTATCGGTCAACCCTCTGGGGTCTATTGGTTACACCTTTCAGC  
AGCTCTCGGCTCACAGATAGCGGATAAAGAGAGTCGACACCTGCTGTTTATTGGCGATGTTCTTTGCAGTT  
GACTGTTTCAGGAACCTCGGCTTAGCAATTCGGGAGAAGATTAACCCATTTGCTTCATCATCAATAATGACGG  
GTATACCCTGCAACGTGAAATCCATGGGCCAAATCAAAGCTATAACGACATTCGGATGTGGAACATATCGAA  
ACTTCCGGAATCGTTTGGCGCAACTGAAGAACGTGTGCTGTCGCAAAATCGTGCCTACAGAAAACGAGTTTGT  
CAGCGTTATGAAAGAAGCGCAGGCAGATCCGAATCGCATGTACTGGATCGAGCTGATTCTGGCCAAAGAAGA  
CGCTCCGAAAGTCTGAAGAAAATGGGCAAACCTTTCGAGAACAGAACAATCCTAATATAAGTAGGAGAT  
AAAAACATGATTAAGCCTACGCTGCCCTGGAAGCCAACGGAAAACCTCCAACCTTTGAATACGACCCCGGT  
GCCCTGGGTGCTAATGAGGTGGAGATTGAGGTGCAGTATTGTGGGGTGTGCCACAGTGATTTGTCCATGATT  
AATAACGAATGGGGCATTTCCAATTACCCCTAGTGCCGGTTCATGAGGTGGTGGTACTGTGGCCGATG  
GGCGAAGGGGTGAACCATGTTGAGGTGGGGATTAGTGGGGTGGGTTGGCATTCCGGCTACTGCATGACC  
TGCCATAGTTGTTATCTGGCTACCACAACCTTTGTGCCACGGCGGAATCGACCATTGTGGGCCACTACGGT  
GGCTTTGGCGATCGGGTTCGGGCCAAGGGAGTCAGCGTGGTGAAATTACCTAAAGGCATTGACCTAGCCAGT  
GCCGGGCCCTTTTCTGTGGAGGAATTACCGTTTTTTCAGTCTTATGGTGGAACTGAGTTTAAAGCCACTGCA  
AAAGTGGCAGTGATCGGCATTGGGGCTTTGGGCCATTTAGCGGTGCAATTTCTCCGGGCCCTGGGGCTGTGAA  
GTGACTGCCTTTACCTCCAGTGCCAGGAAGCAAACGGAAGTGTGGAATTGGGCGCTCACCACATACTAGAT  
TCCACCAATCCAGAGGCGATCGCCAGTGCAGGAAGGCAAATTTGACTATATTATCTCCACTGTGAACCTGAAG  
CTTGACTGGAACCTTATACATCAGCACCTGGCGCCCCAGGGACATTTCCACTTTGTTGGGGTGGTGTGGAG  
CCTTTGGATCTAAATCTTTTTCCCCTTTTGTATGGGACAACGCTCCGTTTCTGCCTCCCCAGTGGGTAGTCCC  
GCCACCATGACCACATGTTGGACTTTGCTGTGCGCCATGACATTAACCCGTGGTGGAAACAATTTAGCTTT  
GATCAGATCAACGAGGCGATCGCCATCTAGAAAGCGGCAAAGCCATTATCGGGTAGTGCTCAGCCATAGT  
AAAAATTAGTATAAGTAGGAGATAAAAAACATGAGAATCTTTTAGTGGAGGATGATTTGCCGCTGGCGGAAA  
CCCTTGCTGAAGCATTGAGTGACCAGCTTTACACCGTTGATATTGCCACCGACGCTTCCCTCGCCTGGGACT  
ATGCTTCCCGACTGGAATATGACCTCGTTATTTGGATGTGATGCTGCCGGAGTTGGACGGGATTACCTCT  
GTCAAAAATGGCGATCGCACAGTTATTTAATGCCAATTTTGTATGATGACAGCCAGGGATACGATCAATGATA  
AAATCACGGGCTTGGATGCGGGGGCGGATGATTATGTGGTCAAGCCAGTGGATTTGGGGGAGTTATTTGCCA  
GGGTGCGAGCTTTGTTGCGTTCGGGGTGTGCAACGTGCCAACCAGTTTGTAGAGTGGGGGCAATCAGGTTGG  
ATCCAAGCACCTATGAAGTTAGTTATGACAAAGAGTGTGCTTTGACCCGCAAGGAATACAGCATTCGG  
AATTACTACTCCGCAATGGCCGTCCGGTGTGTAAGTTCGGAGCATGATTATCGATAGTATCTGGAAGTTGGAGA  
GTCCCCCAGAGGAAGATACGGTTAAGGTGCATGTGCGGAGTTTGCACAAAAATTAAGGAGTCCGGTTTAT  
CAGCAGATGCCATTGAAACGGTCCATGGCATTTGGGTATCGTCTGGCCAAATTAACGGAAAATCTTTGTGCC  
AAGGGAAAACCTAGTCTAGATTTTGTGACGGTAAAGCCAAGCTGAAGGCTGACAAAATCTATACTGTTATA

TCCCCCTTCTCGGGGACTTAGGCGGTTAATAACTGGGGTTTTTGTAGAAATATTTTGGCGTTAATTA  
TTTTATTCTCTGGTTAATATTTTCGAGACTTTGCAGACTTTGTATTTGAGGCCAGACTCCAATGTTGAAACTA  
GCCGGTAAAAAAGCCTCTGCCCTGACCTGCAAGAAAACGAAGGCAAAAATGGTATCTAGAAATGGATCGG  
CAGTGGTATCAATCAGTCAAGCGATTTTTATGTCCAAGTTTTGAAATTTCTGCTATCAACTTCCAAGATATT  
TTGTTTAAACAATGTTGACGTTGGAGAATATCATTCGATCCTAGTTGGTTGCGGGATTAATATGAATCAATT  
GATATTTAGCTACTTTAGATTTAGTGACCATTATTAATAAATTTGTCTGCTAAGCCGCGGCCCTACTACTA  
ATTACGGATTGTGCCGACAGTCAGATCACGGTACAAGCTCGCAGTTACCTGCCCAAATTGACGGCGTTTTT  
GCCAAGGATCATGATTTAGCTTTATTGTTAAAAGTCATGAAAATTATTGCCAAACAAAAATATTTTAAAGTAA  
GGTTTTTCTACTGGGATTTCGCTAATATATGGGCAAATTTCTAATTCCAATCGAATTTGTTTTTCTGGCGATC  
GCCATGACCTGTTATTTATGGCACAGACAAAACCAAGAACGCCGAGGATTGAAATTAGCATCAAGCAACAA  
ACCCAACGGGAACGATTTATTAACCAAATTACCCAACATATCCGCCAATCTTTAAACTTGGAACGGTTTTTA  
AATACCACCGTCGCTGAAGTTAAAACCCCTGTTGCAAGTTGATCGAGTTCTAATTTATCGCATTGGAAGAT  
GGCAGGGCAGCGCCATTACGGAATCGGTGAATGCCAATTATCCTAGTATTTTAGGGCGGACCTTTTCCGAT  
GAAGTTTTTCCCGTTGAATACCATCAAGCCTACACCAAAGGTAAAGTACGGGCCATTAATGACATTGACCAG  
GATGACATAGAGTTTGCTTAGCTGATTTTCGTCAAACAATTTGGCGTGAAATCAAAAATTAGTAGTGCCCATTC  
TTCAACATAATCGTGCTTCTTCCCTAGATAATGAATCAGAAATTTCCCTATCTTTGGGGGCTGTTAATTACCC  
ATCAATGTGCTTTTACCCGGCCATGGCAACCGTGGGAAGTGGAGTTAATGAAACAGCTAGCCAATCAGTTCG  
CGATCGCCATCCAACAATCGGAATTATATGAGCAATTACAGCAACTCAATAAAGATTTGAAAACCGAGTCG  
AAAAACGCACCCAGCAACTTGCCGCCACCAATCAATCCCTAAGAATGGAAATCAGTGAGCGACAAAAACGG  
AAGCCGCTCTCCGCCACACTAACCATACTCTGCAATCCCTGATTGCGGCCCTCCCCAGGGGTATTTTTACCC  
TTAATTTAGCAGACCAAATTCAGATTTGGAATCCTACAGCAGAACGTATTTTTGGTTGGACAGAAACAGAAA  
TTATTGCCCATCCAGAATTATTAACATCCAACATTTTGCTGGAAGATTATCAGCAATTTAAACAGAAAGTTT  
TATCAGGCATGGTTTTCCCTAGCCTAGAATTAATAATGTCAAAAAAAGATGGTAGTTGGATTGAAATGTCC  
TTTCCGCTGCTCCCTATTGGATAGTGAAGAAAATATTGCCGGATTGGTGGCGGTTGTCGCCGATATTACCG  
AGCAAAAGCGGCAGGCAGAACAATTCGTTTGCTACAATCCGTTGTGGTTAATACTAATGATGCGGTGGTGA  
TTACGGAAGCGGAGCCATTGATGATCCCGGGCCGAGAATCTCTATGTCAATGAAGCATTACTAAAATCA  
CCGTTTATACTGCTGAAGAAATGCTAGGCAAAACCCCGAGTTTTACAGGGACAAAAACTAGTCGCACTG  
AATTAGATAGGGTGCAGCAAGCCATTAGTCAATGGCAATCAGTTACCGTTGAAGTGATTAATTATCGTAAGG  
ATGGCAGTGAGTTTTGGGTGGAATTTAGTCTGGTGGCCGTTGCCAATAAAAACAGGTTTTTACACCCATTGGA  
TTGCTGTGCAAAGGGATGTCACTGAGCGCCGACGCACGGAGGAAGTCCGCCTAGCTTTAGAACGGGAAAAAG  
AATTAAGCCGCCTAAAAACTCGTTTTTCTCCATGGCTTCCCATGAATTTCTGACTCCCTCAGTACGGCCT  
TAGCTGCTGCCAATTACTGGAAAATCTGAAGTGGCCTGGCTTGATCCCGATAAGCGTAGCCGGAATTAC  
ACCGTATTCAAAATTCCTGAAAAATATGGTACAGCTCCTGGATGATATTTAATCATTAACCGTGCCGAAG  
CGGGCAAATTGGAATTTAATCCTAATTGGTTAGATTTGAAATTTATTGTTCCAGCAATTTATCGAAGAAATC  
AATTAAGTGTGAGTACCAATATTTATTTGACTTTATTTGTAGCGCTCAAGATACGAAGGCATTGGTGGATG  
AAAGTTAGTGCAGTCTATTTTATCTAATCTGTTATCTAATGCGATTAAATACTCTCCCGGGGAGGGCAGA  
TTAAAATTGCCCTAAGCCTAGATTCGGAACAGATTATTTTGAAGTACCGACCAGGGCATTGGCATTTCGC  
CAGAGGACCAAAAGCAAATTTTGAACCCTTTCATCGGGGCAAAAATGTCAGAAATATTACGGGAACAGGAC  
TCGGTTAATGGTTGCCAAGAAATGTGTTGACTTACACAGTGGCAGTATCTTGCTAAAAAGTGCAGTTGACC  
AGGGAACAACAGTTACTATCTGTTTAAAACGCTATAACCATTTGCCTCGAGCTTAGCGCAAAAACCCCGCT  
TCGGCGGGGTTTTTTCGCCTGCAG

**pKT-P<sub>trc-core</sub>-KDC-ADH**

CTGCAGGAGCTGTTGACAATTAATCATCCGGCTCGTATAATGTGTGGAGATCTTATAAGTAGGAGATAAAA  
ACATGTATACGGTTGGAGATTATCTGCTTGATCGCCTGCATGAAGTAGGCATTGAGGAAATCTTTGGTGTTT  
CGGGTGATTACAATCTGCAATTTCTGGATCAGATCATTAGTCGCAAAGACATGAAATGGGTTGGTAACGCCA  
ATGAACCTGAATGCGTCTGATATGCTGACGGTTATGCCCGTACCAAAAAGCGGCTGCGTTCTTGACGACCT  
TTGGTGTGGGAGAACTTAGCGCCGTAATGGCTTAGCCGGCAGCTATGCGGAAAACCTGCCTGTAGTGAAA  
TCGTTGGCTCTCCACGTCAAAAAGTGCAGAATGAAGGCAAATTCGTCCATCATAACCTGGCAGATGGCGATT  
TTAAGCACTTTATGAAAATGCATGAACCTGTGACAGCGGCAGAACTCTGTTAACCGCGGAAAACGCCACCG  
TTGAGATCGACCGCTACTAAGCGCTCTGCTTAAAGAACGTAAACCGGTGTATATCAATCTGCCGGTAGATG  
TCGCGGCTGCGAAAGCCGAAAACCAAGTTTACCGCTGAAGAAAGAGAATAGCACATCTAACACCAGTGATC  
AGGAAATCCTCAACAAGATCCAGGAATCCCTGAAAATGCGAAAAGCCGATCGTGATTACAGGACACGAAA  
TTATTTCAATTTGGGCTGGAGAAAACCGTGTCTCAGTTTATAAGCAAGACGAAACTGCCTATTACCACCTTGA  
ACTTTGGTAAATCGTCCGTGGATGAAGCGTTACCGTCTTTTTGGGGATTTACAATGGCAAACCTGTCAGAGC  
CGAATTTGAAGGAATTCGTGGAAAGCGCCGATTTCAATCTGATGCTTTGGCGTGAACCTGACTGATAGTTTCA  
CGGGTGCCCTTACTCATCACTTAAACGAGAACAATAATGATCTCTCTCAACATTGACGAGGGCAAGATTTTCA  
ACGAGTCCATTCAGAACTTCGACTTCGAGTCTTTGATTAGCAGTCTGCTGGATCTGTGCGAAATCGAATACA

AAGGGAAATACATTGACAAGAAACAGGAAGACTTTGTACCGTCCAATGCATTACTGAGTCAAGATCGCCTGT  
GGCAAGCGGTTGAGAACCTTACGCAAAGCAACGAAACCATAGTCGCCGAACAAGGTACGTCGTTTTTCGGAG  
CAAGCAGCATCTTCCTGAAACCCAAATCACACTTTATCGGTCAACCCTCTGGGGTCTATTGGTTACACCT  
TTCCAGCAGCTCTCGGCTCACAGATAGCGGATAAAGAGAGTCGACACCTGCTGTTTATTGGCGATGGTTCTT  
TGCAGTTGACTGTTTCAGGAACCTCGGCTTAGCAATTCGGGAGAAGATTAACCCCATTTGCTTCATCATCAATA  
ATGACGGGTATACCGTCAACGTGAAATCCATGGGCCAAATCAAAGCTATAACGACATTCGGATGTGGAACCT  
ATTCGAAACTTCCGGAATCGTTTGGCGCAACTGAAGAACGTGTCGTGTCCAAAATCGTGCGTACAGAAAACG  
AGTTTGTGTCAGCGTTATGAAAGAAGCGCAGGCAGATCCGAATCGCATGTACTGGATCGAGCTGATTCTGGCCA  
AAGAAGACGCTCCGAAAGTCTGAAGAAAATGGGCCAAACTCTTCGCAGAACAGAACAAATCCTAAATATAAGT  
AGGAGATAAAAAACATGATTAAAGCCTACGCTGCCCTGGAAGCCAACGGAAAACCTCAACCCTTTGAATACGA  
CCCCGGTGCCTGGGTGCTAATGAGGTGGAGATTGAGGTGCAGTATTGTGGGGTGTGCCACAGTGATTTGTC  
CATGATTAATAACGAATGGGGCATTTCCAATTACCCCTAGTGCCGGGTCATGAGGTGGTGGGTACTGTGGC  
CGCCATGGGCGAAGGGGTGAACCATGTTGAGGTGGGGGATTTAGTGGGGCTGGGTGGCATTCCGGCTACTG  
CATGACCTGCCATAGTTGTTTATCTGGCTACCACAACCTTTGTGCCACGGCGGAATCGACCATTGTGGGCCA  
CTACGGTGGCTTTGGCGATCGGGTTCGGGCCAAGGGAGTCAGCGTGGTGAAATTACCTAAAGGCATTGACCT  
AGCCAGTGCCGGGCCCCTTTTCTGTGGAGGAATTACCGTTTTTCAGTCCATGTTGGTGAACCTGAGTTTAAAGCC  
CACTGCAAAAAGTGGCAGTGATCGGCATTGGGGGCTTGGGCCATTTAGCGGTGCAATTTCTCCGGGCTGGGG  
CTGTGAAGTGACTGCCTTTACCTCCAGTGCCAGGAAGCAAACGGAAGTGTGGAATTGGGCGCTCACCACAT  
ACTAGATTCCACCAATCCAGAGGCGATCGCCAGTGCGAAGGCAAATTTGACTATATTATCTCCACTGTGAA  
CCTGAAGCTTGACTGGAACCTTATACATCAGCACCTGGCGCCCCAGGGACATTTCCACTTTGTTGGGGTGGT  
GTTGGAGCCTTTGGATCTAAATCTTTTTCCCTTTTGTATGGGACAACGCTCCGTTTCTGCCTCCCCAGTGGG  
TAGTCCCACCACCATTTGCCACCATGTTGGACTTTGCTGTGCGCCATGACATTAACCCGTGGTGGAAACAATT  
TAGCTTTGATCAGATCAACGAGGCGATCGCCCATCTAGAAAGCGGCAAAGCCATTATCGGGTAGTGCTCAG  
CCATAGTAAAAATTAGTCTAGACGCAAAAAACCCGCTTCGCGGGGTTTTTTTCGCTGCAG

\*The regions encoding *ccrR* (Turquoise), *P<sub>cpcG2</sub>* (Green), Shine-Dalgarno-like sequence derived from *cpcB* from *Synechococcus* sp. PCC 7002 (Gray), *kdc* (Yellow), *adh* (Pink) and *ccaS* (Red), *P<sub>irc-core</sub>* (Dark red) were shown.

**Table S5** Primer sequences used in this study.

| Primer No. | Sequence (5' to 3')                                                                          |
|------------|----------------------------------------------------------------------------------------------|
| P01        | GTTTAATTACTAACTAGATCTTATAAGTAGGAGATAAAAACATGTATACGGTTGGA<br>GATTATCTGC                       |
| P02        | TATCTCTACTTATATTAGGATTTGTTCTGTTCTGCGAAGAG                                                    |
| P03        | CCTAATATAAGTAGGAGATAAAAACATGATTAAAGCCTACGCTGCC                                               |
| P04        | TTACCGTCAAAAAAATCTAGACTAATTTTTACTATGGCTGAGCACTACCC                                           |
| P05        | GTTTAATTACTAACTAGATCTTATAAGTAGGAGATAAAAACATG                                                 |
| P06        | CTACTTATACTAATTTTTACTATGGCTGAGCACTACCC                                                       |
| P07        | GTAAAAATTAGTATAAGTAGGAGATAAAAACATGAGAATTCTTTTTAGTG                                           |
| P08        | TTACCGTCAAAAAAATCTAGACTAGTTTTTCCCTTGGCACAAAG                                                 |
| P09        | AATTCTGCAGGAGCTGTTGACAATTAATCATCCGGCTCGTATAATGTGTGGAAGAT<br>CTTATAAGTAGGAGATAAAAACATGTATACGG |
| P10        | AATTCTGCAGGCGAAAAAACCCCGCCGAAGCGGGTTTTTTGCGTCTAGACTAATT<br>TTTACTATGGCTGAGCAC                |
| P11        | GGTTGGTAACGCCAATGAAC                                                                         |
| P12        | ACCAAAGTTCGTCAAGAACG                                                                         |
| P13        | GCTAATACCAATGTGCCGA                                                                          |
| P14        | CACTGCTGCCTCCCGTAG                                                                           |
